# Supplementary material
Source: PubMed Central journal article supplement (PMC8058698)
Supplement: NIHMS1690165-supplement-Figure_S2.pdf [file NIHMS1690165-supplement-Figure_S2.pdf]

>P.berghei str. ANKA - XP\_677551.2

MNINLQIDTFFLDYTKTKGKIKIDTDWDEGIIVNRYIELGNGISKSLNDDNKNTQYEEK  
KEQKICNLNTERPSDENKKIDSRNDISETLIKEKRNFLPNDNTVDNCVCINSFHDNLNEL  
KDATLVRWTCMVQQIISPECYLGIVKLRNKTGEIILKSSKYRDIYDMDDNWEVIEESEK  
KNAIGEYESSYGYNDITEQANKDTSNENDKSANNWTIKTEINKMDNENKNGNKLQK  
CDEIIMGKENEEGYTQNNKKDVMFYDNYNNFTKYWNRFLFLCTNIPGSKGSWCKNLLEYT  
SYLSNSEFFLKNPNNYEQNDKNSDSIGYSCKLVRTSESRLIENSSTKNEKDNTCHNPS  
ENHLNSNINNDISNLLKTKQPQNETVKEEKDFITSQKMRCIVKIYDSNSQYNGKNAE  
GFLKLNIIIEIGIFRKHQIKDYEDYQKNLNYYFSDQNFQKPCIHVFRYTKINIFNPI  
NNCILFKNDLTLNILESGPFNNINDLRKHLIIYISTHFSNDLLVAHYIFFYLCASYINESK  
LKLKGFSLIFNLLTKNISTDKPYQHDSNLSNDQKDLNIVKRDITKSEESLENTIRQMP  
NIQNVNMFNDGKEFANNIININMFINLIPLYRYIPLSLSKLNSDYSSVMNNSGELK  
KGKQLANNTYIAFDECLLDVGNLNSIGIKNFHCIERLITSQELPYFFNTDITFETQNNI  
LILSKKSMFYNYIDISVPILQKEREPLDTCNVEKESLTKIETSKNIIDNLKTTQK  
NDIGMDQKNSDGENISKSISFSDFKNTYENYKPNENELMQFRYINYLKNSHSAKIT  
TDIQNYITDYFVTLRQTNKSINQFILNTWICSRIFAFSDGSDEITKDHWNIMELEER  
RVRMDNLDRIYV

>P.chabaudi chabaudi ♂ XP\_739580.2

MNVLNQIDTFFLDYTKTKGVKKIDADWDEGIIVNRYIELGNGISKNINDDNKSTEQSEK  
KEKKICNLNETPLDGNKNIAPRNDISETIIEKGSNILLNNNNVDNCVCINSFPDLNEL  
KDATLVRWTCMVQQIISPECYLGIVKLRNKTGEIILKSSKYRDIYDMDDNWEVIEDSEK  
KYGIGEYESSYKYNDNTEQANKDNAKENEESGTQKDKDIMPYDNYSNFTKYWNRFL  
LCTNVPGNKGSWCKLDYDTSLSNSEFFLKNPNNYEQSANKNSDSIGHSCKLVRISESR  
LTESSYNVKNKNTNICSNPSENLDNINNGIPNSLLKNEQSQNGTIKEEKDFITSQKM  
RCIVKIYDANSQYNGKNSDFLKLNDIIIEIGIFRKHQIKDYEDYQKNLNYYFSDQNF  
KPCIHVFRYTKINIFNPNINCILFKNDLTLNILESGPFNNVNDLRKHLIIYISTHFSNDL  
LVANYIFFYLCASYINESKLLKGFSLGIFNLLTKNTSNDKPCQQPNALNNDQKDLNYI  
KRDITKPEDPMENTVNQIPITKNINNFNDGKTFSNIIININMFINLIPLYRYIPLSL  
KLNSNYLVSMNNDNGELKKGKQLANNTYIAFDECLLDVGNLNSIGIKNFQCIERLITS  
QELPYIFNTDITFETQNNILMSQKSMFYNYIDISVPILQKERKSLNDSNDEKESYNG  
ASKIETSKNIGVDNLKTDQKNIGIDQKNSDNDENISKSISFNEFKNTYENYKPNKEL  
MQFRYINYLKNSHSAKITTDIQNYITDYFVTLRQTNKSINQFILNTWICMSRIFAFSD  
GSDEITKDHWSYIMELEEEERRVRMDNLDRIYV

>P.falciparum 3D7 - XP\_001348293.1

MNVLNQIDECFSDYLKIYGPKEIDSHWDEGVVVNRYITLGKAKDNENKDNINKGDDNNN  
NNNNNIKEEINKNDLSEEKNGYKNYSNDKENDNSTYMAKNKKQKENLFCNDLVEKCI  
CLNNLESLEEIEDASLVRWTCMIQQIISPEYLGIVKLRNKTGEIILKSSKYRDIYDMDDN  
DNWEIVEENEKRGMGGEYEFNINKYENGDNKMDQTVDLKNNQDVDDKIDEHNKDEKS  
DPNKICSNEQNDITNNNTYDNMELYENDGNFNKYWKRYLFFCTNIPGNKSAWTKELYDYS  
SSYVNVREVFLKSKSDYENGIYKDKVDPMNEDVNSVASSTDISNYMNSNNNNNSINN  
IYSSREYICSSNELNETQNNNNNKDKNEYKKIDTNDKINNNNSNNNSNNNSKSNHNNNY  
FINSTDLDMNSNISSNICSYNISPVNTSNKIRCIVKIYDDDSQYNGKNDKEFLKLVIE  
IIGYRKHQIKDFEDYKKNYFYFYDQHFQKPCIHIFQYKINYNPLNCCILFKNDL  
SIIISQGFNDIQKLRHHLIMYISSAFNNDMLIAHYFFYLCGSYIKESKLLKGLSLNI

FNILYNNEIEKLNHDHSSDNVNPDMKKLQNKIPNDIDLEKDANQLKVTNNNCFLNSNNK  
VLVKEADKKGKIAPHAKKINKMIKNLIPLYRIPLILQKLNTEYLVSMNMQYGGELKKGKL  
QLANNTYLTDFDECLLDVGNLNNISIKNFQCIERLITSQEIPFIFNMDIIFQTEHNILLS  
KKKSMYSHYVDIAIPICHYKIKHNLDTNNEQKNENIENVKSTNNDEPSNSHDQKNEQ  
TKGIFSEFYNNINNNYKPNKELMQFRRYINYILSKNHSKIPEDITNYITDSFVLLRQ  
KNKDINQFVLNSWICMSRILAFSDGHNEINRDHWDYIMKLENERRLRLNNLNKIYI

>P.knowlesi strain H ð XP\_002260876.1

MNVLTQIDDCFANYIKIHGAQEVDSYWDEGIVVNKYIELGNGHEKKGKTPSSTKEHVEQG  
NQEDASSAQKSNCGNEGGLNLSKSTLAKESLFTCNVVEECVCLNTVDNIENLKDATLVR  
WTCMVQQIISPESYVGIYKLRNKKNGEIVLKSSKYRDIYIDDDKWEIMEDNEKKNVGEYY  
ELNYEQYCKMGDDERGTHTHTGGMNPTDETNPQVKNKSTPITAGTSTNQVDQETCPKN  
YDEKKKDHTVLNNQSEDIPFYESDNNFKKYWKRYLFLCTNVPGNKSTWVKELCEYSSYYD  
NCENFLKNESVKGGNVWAGKCTAISNCSTDEEGNAEGGGFSTDDVRLSRETICSSEFEPE  
EWATAGHATNQTINHATDHTTDRATDQTTNRATDQTTNHATDHTTGLPMDTIVSGAPKRP  
RRDPEKKNKLRCCIYDDNSQYNGKNEKDFLKLNDVIEVIGIYRKHQIKHFENCEKNLN  
FYFYDQNFYKPCIAHAFRIYKVRFNPLSSCILFKNELCNILQSGPFSTVGELRRHLLM  
YISNIFSHDLLLAHYFFYLCSYIEENKLGKISLNVFNISTDGERCASPTETTMEEK  
QKISEGEKEEKEEKKVSPKEPLQKGENCSKMMDEYKEVQNKSYPRHAIQINKMMKNLV  
PLYRYIPLCLEKLSSQYLVSMNHQNGELKKGKQLANNTYLAFFDECVLDEGKCNITSTK  
NFLCIERLITSQEIPFIFNTDITFETQNNVLILSRKKSMMYVNYVDIHIPVCHQRGKGHGG  
VGQSGVISAGKVEQSLRKMDEVEKEGKTEEGQEKTEGTKEEGAHDGAKPKYKENEPEK  
NFSAISAFSAEFINTCENYYPKEDELMQFRRYINYILSKSHPAKIHSDVTYITDSFVSL  
RQTSKDVNQFVLNSWICMSRIWAFSEGCNEISRECWDYIMKLEAERRLRSLDALYI

>P.vivax Sal-1 ð XP\_001616833.1

MNVLTQIDDCFANYIKIHGAQEVDSYWDEGIVVNKYIELGNGHEKKGKAPSGAKENGEET  
NQEDAPPAQKPNGGSEASPNSKSNLKEENLFTCNVVEGCVCLNTLENVEDLKDITLVR  
WTCMVQQIISPESYVGIYKLRNKKNGEIVLKSSKYRDIYIDDDNWEIMEDSEKKNVGEYY  
ELNYEQYCKRGDDERGTKEAQHTDGKLTNEANPQLSNNSPPTATQTSTNQIDKKTCPK  
SYDQKKKENHTVMNDQSEDIPFCESDINFKKYWKRYLFFCTNVPGNKSTWCKQLCDYSSY  
YSNCENFLKNEAVKGGNICAGKCAALSSCSTEGGNAKGGSSADDVRLSRETICSSEFE  
PEEWNTAGCKADHTAGLPKDTTASGAPPKALKGAYTGAPENPPRDPEKKNKVRKIVKIY  
DDNSQYNGKNENDFLKLNDVIEVIGIYRKHQIKDFEDCEKNLNFYFYDQNFYRYPCHA  
FRYIKVRFNPLSSCILFKNELCDILQSGPFSTVGELRKHLLMFISNSFSHDLVAHYFF  
FYLCGSYIEESKLGKVLNVFNISTDGEKCAKSPKTTMVENQRIKEEEVPPKEPLQK  
GENASNLMDHEHKEVQNKSYPSHTTQMNMMIKNLVPLYRYIPLCLLSSQYLVSMNHQ  
GELKKGKQLANNTYLAFFDECVLDEGKLVSTKNFLCIERLITSQEIPFIFNTDITFET  
QNNVLILSRKKSMMFVNYVDIHIPVCHQRGGGLAGSGVSSAGKVGEQKSKGTAEETANKTT  
EVTTEVTSAGAHGQANSHPKENEPGKNSPAFAEFINTCENCHPKEDALMQFRRYINYI  
LSKSHSAKIHSDVTYITDSFVSLRQTSKDVNQFVLNSWICMSRIWAFSEGCNEISRGHW  
DYIMKLEGERRLRSLDALYI

>P.yoelii yoelii str. 17XNL- XP\_724198.1

MNVLNQIDTFFLDYTKTKGIKIDSVDWDEGIIVNRYIELGNGISKSLNDDKKNTEQCEEK  
KEQKICNLTKNEKPSDENKIDSKNDISETLIKEGNNSLPNNNTVDNCVCINSFPDLNEL  
KDATLVRWTCMVQQIISPECYLGKYLKRNKKTGEIILKSSKYRDIYIDMDDNWEVIEENEK

KNAIGEYESSYDKYNDITEQADKDNANENNKSANNCRIKTEINKMDNENKTDNNKFDQN  
CDEVIIGKENEEDYTKNDKDIMFYDNYNNFTKYWNRYLFLCTNIPGSKGSWCKNLYEYT  
SYLSNSEFFLKNPNNYEQNDKNSDPIGHSCKLVTSESKLIKSSDNKNEKGNTCPNPS  
ENDLKSNNVNDISNLLKTEQTQNETVKEEKDEFITSKMRCIVKIYDANSQYNGKNVE  
GFLKLNIIIEIIGFRKHQIKDYEDYQKNLNYFSDHQNFLKYPCHVFRYTKINVFNPI  
NNCILFKNDLTNILESGPFNNINDLRKHLIYISTHFSNDLLVAHYIFFYLCASYINESK  
LKLKGFSLIFNLLTKNISSDKTYQKNSNSLSDQKDLNYYVVRDITKSEEPLKNTIKQIP  
NIQININDGKALANNIININMFINLVPLYRYIPLSLSKLNSDYLSVMNNDSGELKKGK  
LQLANNTYIAFDECLLDVGNLNSIGIKNFHCIESLITSQELPYFNTDITFETQNNILIL  
SKKKSIFYNYIDISVPILQKEREPLDTCNVEKESLSEASKIETSKNIEVDNLKTTQKND  
IGMDQNESNNDENVSKFISFNSDFKNTYENYKPNENELMQFRYINYLKNSHSAKITTD  
IQNYITDYFVTLRQTNKSINQFILNTWICMSRIFAFSDGSDEITKDHWNYYIMDLEEERRV  
RMDNLDRIYV

>A.thaliana | ETG1 ð NP\_181587.2

MGGPAYDCLTNPLGAVRFSFVNALSSGYDPASSVGKDWGVVDLFRHYFSDAISQVPIL  
DSSSIKWVQPKTLVFRFGMIQDMLGNEFYAGAYKDDSTWRNTKYSQVDFPEGSSTEIQV  
WERRLLYCVVPVPGKNQWTECSSQELKNRFLDLTGQNRKRVRVDEEMTDSMDSSTLEAGR  
NGSPFKMKVGEATSSASESQVPQTSQIPATSADSLPCLVKIYDQSPESDLKLNDDVEFL  
GVLTFDPIVMMDDTDLTENDSDALSAESVQMPGKVPRLHCLHHRKLETQHFLHGSSLLP  
EPKSPQIFKEIRESLMKYLTGLLGNHIAAQFLLHLLSKVHGRVDNVAVGKLSLNIHL  
NKESMSIFGTQLSGALKSLPFTQSIPLTIEYLNTASFGPKDYGINRLMPGVLQIADGT  
HLILDETELQPGTLNSVGVENANLLKNLLECQKVEYDFQYYKMEMATDVQMLIFSEGKSN  
IMPADLVPLQPSQVNSLEVITPETAETWRCYLATCKSLSHSIGQELQQVVENDLVAARQ  
TDRSLGSQDLSRLLTMARMMSVSYGETTSLSHWQMVLELERLRKERLK

>C.parvum Iowa II ð XP\_627231.1

MLNLLNKFVEQLNYGKCDINRLISDEKIKQPIKGYFIARGMIEYFQEQELFISDEDLDHG  
SPASSDIFYGCNNLARKNRSNGNSYSFRNVYRFVPIPFENRLHWNHNFVENDQDYFSNVY  
HKFDECIVKTYDFSVELPECTSSIEVETRAFFDYMIDTTSKLIKIDQGTNNKLNELLE  
ILTTVELQDLNDFEYLSKMEELYNSKLIKLSQRTQKRLVLAISFKRISNFSSIFCKEI  
EYYGFLGEGFYSPRTCKLLERLVKYKCPNLNGISDLNYSIEHIANEICDGNLSEYIL  
LCICSRQKLEFNAYEENVSDCISKLPQIVLHISMCKEFVERLNSFLLNHFPRLNWINAD  
ISTLNNGRLTPYFDVEEDRFVTGILQVPLLRNLIVINETSLEDGKLEKLENISNISLL  
TNFGYVNYGFTNYKVPKTESNYIILTSNEKSIFANKSNLSISLNAKYAEENNGILNPRN  
KSGNLVPCNSEANFSFVLKLFISIVGSCVDMLEFDEQTDYIAETFNIRQKSNICNLIH  
ASSLHTWIMLARVQALMNGEEKLSKNRLEQFFRLEIERLEKLSKNGKKNPILN

>C.reinhardtii ð XP\_001690047.1

MANTTTLVAAQAPQQAQQQAQQPARAKRERSSDADAQHDSVAAELRVASTGGAAVLSP  
RAGANAAAAAADAAAPGADAGEESMSHDTGLSEDQGGPAGATAGAGSPGEAEGAARPRVR  
REDPTAARVVDIEAANDRGAPFGTSAPAGPAGTGCDTCAGGHGCAQHPAGANAGAQA  
ATPSEVPGSCIVLYDNAPALPLHEVVEVGVLSHVPQLAQLEYDNQDPLHAQELASLGL  
GSEGVGRSVSGTGGDAAMGEAADRGVLAQAQGERLAFEAIRAAHPPTSKVMRLHAILVRRQ  
PNLVPAATTAALASAAAALAPAAAAEAAAATTPAAGSADTAARRARALALLRWALGGD  
SLAAEYVLLQLSRVNRGDPNALGQLALNISRCPGAVTSATSASASAPPATAASAVGS  
AVAAAAAHSPALAADLAGRGVSGFAAALQAAVSCMVPLSVALPLSVEGCNSLSWSPVR

DVSRERTAPSPLQLAPGTVLLLEDETVMAPGQLSSQGVVSMQALMTLARQQELLYDFETFQ  
HPVPLDLPLIVLTQGRSLLRDCLPLRLPLTATQPFPSAEAVLASGGRPPAAASPATSPPS  
SFGGAAIEPAATPVATANVSMGDGAATASAAAAADVDLAAVRSYLAARAEEQGYELAEGM  
AQVLEQWVFGQRRAAQAHQQGQPQQGQGAADGGMTPEEFHLKLTARLLVLSHGETRL  
TRERWQQLLEHTREARLRVVG

>D.discoideum AX4 Ð XP\_646335.1

MTDNNNLDSLIDKDEYLNPMNVVDKLFKFDQNNLNGTVYKFFENVISEDQIYKSIPL  
VSTINQCDLNSGKLVKIRCMIQDIFDPQFCPSFNKIKNIETNEIRLEASKYKDKINLND  
EELIFDSFDSSTFDKTIYCIPIPCENKVVNNNNNNNNNNNNNNNNNNNNNNNGNEQIS  
SSLLNKKRNIDDADMKNENDEENKSKDQKSTTTTTTTTKEGEEEGEEGEQLTKSKKL  
LTNNKIDINKIFNYPIPIDSNDENLKTPIVNIYDDDIIFDENNKAVTFKINEIIEFVG  
VVAKFNPTLQHQSNSSDQGETTTTTIIDLMSMLDVDEISTIPDTLIPQFHAITYRYLDPY  
KFNHLNPFSDTNTTINNNNNNNNNNNNNNNNNNNNNNNNNNNNNNNPNNNPNNNNLNN  
LIRNELIKFIKLFIVDELLSEYLLFHLISKVYSFTSGLSIGNFSMNISIPNDKEFQRLPQ  
LIELLYEILLARSYRFSMSLENLNDMDVVPYKDYDRNRIVSGLLQLPKGTLNLDLDETQLT  
EGKVESQGIKVLNALSISIQKQVEYDFKYHPIEQDLPDISISFGKSLIKGTTQISIN  
KSIQLPTINEINQQLIHSYNNDKLNQFRNYINHCKNLSFKISSPTTTTIAESDDATRHIQ  
EDFVKSRQLDSKMTTDFVHYWLTLSRLVALSFNDQYIKIDKWNIMKSLEEKRLTINNL

>D.rerio Ð Q803A6.2

MPTTHDWINNPLGVVDGLFAQSNSSPDWEKKVVEYFKEKLLKLNDAHTWVPSLNDVPLHYL  
KPNSLVKFRMCMVQDMFDPEFFMGVYEMNDPTSNSKQVKCGKYKDVTECGQVDFNSRNTVT  
SERQTFYCVPIPGESNWVKESYAGTSQARVVPSTSYVPNRHKRSYEEDDEMDTQCQQTCD  
ISQGAQSSSESHGNTPEPKRQETEAPSQDSSSSHCTSSLDLNFPLPGEKGPACLVKVYEDW  
DSFKLNDMLEVFGILSVDPALSVIADEREASSLLDPTEGMETMEEQRVHSPASLVPRHL  
MLYAQPLAHNNPLLSSPLENNADYLSVGLGELASVRAELLFFTHILMGDSLAAEFLL  
HLISNVYSRRDVLPLGKFTLNLSGCPSSPFTEHLFKVIQQLVPSSYRLSMLNHMNTQR  
MVPKDYTANRLVSGTLQAKNTSLFDETLQEQQLDSTGVRNITALGNLISWQKVDYD  
FNYHQMEFPCNINVLIASEGRSLLPSCDQVHLRASLNPPNLEEYLSAVQVAQVPSQLNKY  
RVYLSVARALNYTISDEITKAVEEDFVDMRKDDPQSMSAEDLHRLLVARLLSLSHGQNT  
LSRDGWMKAKQLEALRISRTQQQKCVNGNEP

>H.sapiens Ð NP\_079110.1

MPCGEDWLSHPLGIVQGFFAQNGVNPDWEKKVIEYFKEKLNENAPKWVPSLNEVPLHYL  
KPNSFVKFRMCMIQDMFDPEFYMGVYETVNQNTKAHVLFHGKYRDVAECGPQQELDNLSPR  
NTTLERQTFYCVVPGESTWVKEAYVNANQARVSPSTSYTPSRHKRSYEDDDMDLQPNK  
QKDQHAGARQAGSVGGLQWCGEPKRLTEASTGQQLNSLNLSSPFDLNFPLPGEKGPACL  
VKVYEDWDCFKVNDILELYGILSVDPVLSILNNDERDASALLDPMECTDTAEEQRVHSP  
ASLVPRIHVILAQKLQHINPLLPACLNKEESKCKFVSSFMSELSPVRAELLGFLTHALL  
GDSLAAEYLILHLISTVYTRRDVPLGKFTVNLGCPNRSFTTEHLYRIIHLVPASFRL  
QMTIENMNLKFIKDYTANRLVSGLLQLPSNTSLVIDETLLEQQLDTPGVHNVNTALS  
NLITWQKVDYDFSYHQMEFPCNINVFITSEGRSLLPADCQIHLQPQLIPPNMEEYMNSLL  
SAVLPSVLNKFRIYLTLLRFLEYSISDEITKAVEEDFVEMRKNDPQSITADDLHQLLVVA  
RCLSLSAGQTLSRERWLRKQLESRRRLQQQKCVNGNEL

>L.braziliensis Ð XP\_001562248.1

MATQDEMEALLCELSTTTGTIAEAVRYAHKYLQSPECQSTAVDMFPPTQLAHSIGKLCRC

RGMIQEVQPELHLFCASRQNFSSASSVETLDGSDREYMDAVSLYVIPVPGNLHFYTMEEP  
SRSLGAAHCDTLRKRSDRDRDASMAAFTSDTENDLIRKYARHTVSASDTTAPPAQSSGMS  
ADGPFLNFPHPCCNRQLQGACVVTVLLPAEEGTRPNPFRINDVIDFYGYQHFPDDQLEVN  
ERDDFAHFSAWNATELSRGLVSRLLCLSYPVSSLQRRRIAMPKLIVSSMAEARANALA  
YLINTVTKGDALTAKYLLLHLCARVRMHSASMPVGDPLLISSPQLVAAEWSAHLREIVP  
VAEILLTGDLRPLPHVRLTPKYNKELNYLEAGLLQVAHGTHITVDCASLGALEEKWYEG  
MFALIHKQQLLEYPYQTELELPVDVSMALHNTGASEALHPLFRFAMSIRWCPCPSVSAQ  
DVALMPHISSAVRDYLDVSRCLEATSLMDDALSDRASRALFEMSANLPGWNNRDPLLHN  
STFSVAIALMRAHAASHGRFDFTAEDIAAVCDLEQERMERLRTPLAAPPPIAHPGVA

>L.infantum  $\text{\textcircled{D}}$  XP\_001470363.1

MPTRHDMEALLRELSTTSGSIAEAVRYAHKYLQSPECRSTAIIDVFPPTQLAHSIGKLCRC  
RGMIQEVQPELHLFCACRQNFSSSGAQEAADGNEVQYMDAVSLYVIPVPGNLHFYTADE  
TSRNSGAAHGGTLRKRTRDRDEDALTGVPTSSTEEERMKCVRHTSSKSDTVTATAQSYSL  
PVFGPSLNFPHPSCSRQLQGACVVTVLLPAENGARQNPFRINDVIDFYGYQHFPDDQLQV  
NDVDDFERFSAWNATELSRGLVSRLLCLSYTPVSSLQVRRHISTPPLIALPMTAARTNAI  
AYLTCTLTGDDALTAAYLLLHLCARVSMHSASTPVGDPLLISSPQLVAAEWSAQLRDIV  
PVAEILLTGEVLRALPHGRVTPKYNNDLNYLETGVLQVANGTHVTIDCASLGRDEAWYE  
GMFALIHKQQLLEYPYQTELELPVDVSTLAVDGRDAPDAVHPLFRFAMRLRWSPDPRIPP  
QEAAQTHHVSSGAVRDYLDVAVRCLDTPSPVDDTLSDRASRALFEMSRNLPGWNNRDPLLH  
NNSFSVAMALMRSHAASHGRRDVVAEDIAAVCELERARMERLHANPPSVLPTASSVAE

>L.major strain Friedlin  $\text{\textcircled{D}}$  XP\_001684021.1

MPTQHDMEALLRELSTTSGSIAEAVRYAHKYLQSPECRSTAIIDVFPPTQLAHSIGKLCRC  
RGMIQEVQPELHLFCASRQNFSSSGAQEAADGDEVQYMDAVSLYVIPVPGNLHFYTADE  
PPRTSGAAHEGTLRKRDRDEDAPTGVPTSSTEEECIRKCVRQMTSESDTVTATAQSSSL  
SAFGPSLNFPHPSCSPQLQGACVVTVLLPAENGARQNPFRINDVIDFYGFQHFDDQLQV  
NDVDDFQRFSAWNATELSRGLVSRLLCLSYTPVSSLQVRHHIATPPLIASPMTEARTNAI  
AYLTGTLTRGDALTAEYLILHLCARVNMHSASTPVGDPLLISSPQLVAAEWSAQLREIV  
PVAEILLTGEVLRALPQGRVTPKYNNDLNYLETGVLQVANGTHVTIDCASLGRDEAWYE  
GMFALIHKQQLLEYPYQTELELPVDVSTLAVDGRDAPDAVHPLFRFAMSLRWSPDKLPP  
QEAAQTHQVSSGAVRDYLDVAVRCLDAPSPVNDTLSEASRALFEMSRNLPGWNNRDPLLH  
NNSFSVAMALMRSHAASHGRRDVVAEDIAAVCELERARMERLRATPSSVLPTASSAAE

>L.mexicana  $\text{\textcircled{D}}$  XP\_003876318.1

MAAQQDMEALLRELSTTSGSIAEAVRYVHKYLQSPECRGTAIIDVFPPTQLAHSIGKLCRC  
RGMIQEVQPELHLFCASRQNFSSSGALEAADGDEVQYMDAVSLYVIPVPGNLHFYAADE  
PSRTSGAAHGGTLRKRDRDEDAPTGVPTSSTEEERIRKCVRHTTSESDTVTATTQSSHL  
SAFGPSLNFPHPSCSHQLQGACVVTALLPAEDGARQNPFRINDVMDFYGYQHFPDDQLQV  
NAVDDFERFSAWNATELSRGLVSRLLCLSYTPVSSLQVRHHIATPPLIASPMTEARTNAI  
AYLTGTLTKGDALTAAYLLLHLCARVIMHSASMPVGDPLLISSPQLVAAEWSAQLREIV  
PVAEILLTGEVLRALPHGRVTPKYNNELNYLETGVLQVANGTHVTIDCASLDRDEAWYE  
GMFALIHKQQLLEYPYQTELELPVDVSTLAVDGRDAPEAVHPLFRFAMSLRWSPDQRLPP  
QEAAQTHQVGSAAVRDYLDVAVRCLDAPSPVDDTLSDRASRALFEMSRNLPGWNNRDPLLH  
NNSFSVAMALMRSHAASHGRRDVGAEDIAAVCVLERARMERLRANSLMLPTASPAGE

>M.brevicollis MX1  $\text{\textcircled{D}}$  XP\_001749094.1

MLILNFDAQLYTDQEVFKVHDLLEVYGIYTLDVHYGEQQGDEFSPERPAPTLPRIHVLH



KLTDIEIGFLQLAVSVRWLPELTTEAAISNDISVDEVRDYFAQVRQLPRRFEREDDISTTQ  
LSDKLLAFSQSEPRWNNHDSFIHNNSFAMAASMMRAYAASVGHVITNESVGFVLALEGQ  
RVARCYDET

>T.congolense\_ CCD12373.1

MMFNFLQNDYWFMRIPSPYKQRAMQAAYDREEVGALIRQKGAELGGTLAALSYPVHNYFR  
SVFSKEEVLGLLYNVFPMGDVQNSAGRMCRRCRGMIEQEMDPNITLYRASSVNFHEATDE  
CEMLEAVQLYVIPVPGNVHFYDTDNPSYEEGMRGQGAACVSCGQIPTCSVASNQNRIV  
SRKRRERTPPGVPQGEGRDNEGMSEGRVLRRCQEGDKLCDGTPSGTTASMPYQQLNL  
PHPLRGTHTACIVTVIFSSNDQKEQIRLNDVDFYGFIDESSLVSSSAMECTEVDEFE  
CFGAWHSEQLPPGVLPRMTCLSWQNVYAEPVHPLNCSYFETRRPLVLQYLKEVVCAGDCL  
LAEYLLHLCARVTTHEGGVPIGDLPLRVEGDIIDLAAWSSHIRNVSPVAEVLDDSSKLL  
DSSLITSRQDGSTNILKAGILQLANGSHVTLDSRAVDSAGDAVQDALFAAIHKQVLLLE  
YPYQTHEIPVDLNFVLSTSRVADEISFLRLAVSVPWIPELATEAAILNRINADDVRDYF  
AQVRRVHRRFEQEEHGMASRLSDRLLAFSHSEPHWNNRDPFIHNNSFAMAATMMRAHAAS  
LGREIISDANVDFVLNLEHQVRRCHGRM

>T.cruzi strain CL Brener D XP\_816101.1

MEFLCCQAEIGKLIREKTEELNDIGAALSFVHHHVLSMVHKSEPGLSMPDVFPSCALQST  
SGKLCRCRGMIEVEPNISFYRASRSDFFGAAEEENMALLEATLLYVIPVPGNSHFYRVP  
QETMSEERAAMNNVPAVGQVFGDRKRRERSDGPLQSSALEREMKQFRQEVVFQSDGASQP  
MRQLSLYQKLNPLPHPLSGFLHTACVTVIQHPAVERDRLRINDVDDFFGLDEDSAMTG  
DRMAAFPLDEFGTFASWHAEQIPPSLSRMTCSISWKEVFSTPIRPVLKNYFETKRPLVLL  
YLANTICQGDALLAEYILLHLSARVITHEATPVGDIPLRVEAQIDPEMWSSFMRSISP  
VGEVLLDASLLSSVDLRVPRQDHMANVLRGTGVLQLANGTHVTLDCCAVSKASNALHEAL  
FAVMHKQVLPLEYPYQLHELPIDLSFLALSTARISEEMELLRLAVSVRWQPELPMAMDL  
TNLSAEDVQDYFSHVRCVCRRFVSEDNSQAHRLAEKLVCFQSSEPSWNNHDPFIHNNSFS  
MAAALMRACAASFRETISDGDIDHILFLERDRVARRC

>T.thermophila D XP\_001014433.2

MIINYSYQNESEILLEKNLKAQQEMDSQQSFAKNIQVELQKRIAEEVKSNNPILSDLAKI  
NDVDIQLDQLLNKKAICLESRLSLNDLKQADGQLVEFTYMIQSMFNPEMYAIAAIDAEO  
VKNGNIDSAIEVFYHDTITSQNLNPNHQDEFNENIVSALGDRQIYYAIPNQNKWSKL  
VGQNKNNQGQEEIGLEKKEAHVSYQGIQVSSLDISKYAPKLQQIGLFNYESDKDSSLH  
AFPCILKYNNQEQSQNPKNQIVKVTGILSYNLSLSDENEHEINQQEEVGDDDQYESFD  
RISYLYPERLIPRIHVLSSQVISYSDIYSSSIKQLSNLEVSTQAQRQVLLLEALTILGND  
QISAFYLLMTLISSVNLKDEKHYGNLFLNLLNTSQKLSSGAKISETLNDFLQSILVYSV  
SIPFTLKYLNAYLQPKSSSSGKISYGSLLQPKETKHFICDETSLQQGQLDQKGVHNVK  
NMIIFFQDLRVPFESEFYKGFVETDVSGLVSDGKGLLYKDIQIKLEEDIDEESKQSTLF  
TFDILNDNNFLNQIRKYILESKNQALTVQLDEEVANNIQIDFVEKRKQAKENILNKEII  
INQESLERWIIQLCRLNAASKLKKIATIEDYLEIKKLEENRIKRTMKDIKIWQQK

>T.vaginalis D XP\_001317960.1

MFEELLENPKFVDRLAQNETDAPDLGKINLLDQFIQQNPQELEKIPLICNLEGMNSTVP  
GSLVRVRCISIINSNIKEYFPFRYLSGTYHSCLIDEISGTPQDIDPSCLGERYIYTAFS  
VRPMTNWLKESAVTINKRKVPTLSEKKNTEVKLNTQFDMIVKTAFDYKIKNTFDTVDV  
IGVFSTAEDHIAMRDIPKEVYPTILALTIVESTNYTKSLPDPAISLVEQRNLALVLLSS  
ALEPHQSLIVLLWLLSFYTHSVAGTAFGSFSLNLTGATYEQALKLKEVLENIIPLSKYID

FNQESLSDQKFVTEITDEGVFGNLIASSGSRFIIDETQLHEGNFNKNGTQNLMLNNLIE  
NQVIPVYHDSPEFYDINANRYRILGLSSSKLLKYDISVPIGNLIENLSEFTEEQNLNVVR  
KYIENQTLSDKLEFNKEREQIANKKLAECITTHKLSQERAQLLFLFLLNVSSYGDEINF  
ESALDEAIELFFSFNQ

>T.vivax D CCC48825.1

MDIAYSKSMVSALIRDKSAELGSIEAALSIVRACLQTSIAGSSHNGHIHNVFPRGAARGR  
GEQLCRCRGMIQEMEPNVSLYNASCEDFFGSAMGGDSVMLEAVVLYVIPVPGNAHFYSVP  
SNGVENQSNAAAGGENPLQHVPSASFIDITNDRKTRKRTQCGGREDDGVCAGNGFDCERNPK  
QWRHEGGGEIKVAVDAPLYQQLNLPHPMSADLHTACIVTVIQHESAGTGRLKLNLDLDF  
YGFATDSVETAIGTDAVQMEVDEFEDFGTWHANGLPASFVMHMTCLSWQHVVYSEVDRPLS  
PDYYGGTRAMALQALRSTLCQGDALLAEYVLLHLCARVVAHEGGTPIGDIPLRVEGDIMN  
PEVWSSYMRDVAPVGEVLLGATQLSDPSRLRTPRQDHNCNMLRTGILQLANGTHITLDSR  
AVASACAAVQDALFAAVQKQVLLLEYPYQAHELVDLGFALSTAHISEEISFLQLAVSV  
RWMPELPLDAAAPTDLVAQDVRDYLNVNRCVPRRFDSSENSAVARLSERMLSFSSVPRW  
NNHDSFIHNSFAMAAALMRAHAASYGRPFIADEDVEHVLHLESQRVARCSLDRGPWTS  
>C.hominis D XP\_668528.1

MLNLLNKFVEQLNYGKCDINRLISDEKIKQPIKGYFIARGMIEYFQEQELFISNEEFDHG  
SPASSDIFYGCNNLARKNQNRNGNSYSFRNVYRFVPIPFENRLHWNHNFVEKENDQDYFSN  
VYHKFDECMVKTYDFTVELPECISLIEVETRAFFDYMIGTTSKLNQGTNKLKINEL  
LEILTVEIQDLNFEYLSEMEEKLYNNKLIKLSQRTQRKLVLVHVISFKRISNFSSIFCK  
EIEYYGLGFEFYSRPTCKLLERLVKYKCPNLNGISDLYNISIEHIANEICDGNLSEY  
ILLCICSRQKLEFKAYEENISDCISKLPQIVLHISMCKEFVERLNSFLLNHLPRLNWIN  
VDISTLNNGRTPYDFVEEDRFVTGILQVPLLRNLIVINETSLEDGKLEKLENISNIS  
LLTNFGYVNYGFTNYKVPKTESNYIILTSNEKSIFANKSNLSISLNAKAAEENNGILNP  
QNKSGNVVPCSEANFSFVLKLFISIVGSCVDMLEFDEQTQDYAETFNIRQTSNICNL  
IHATSLHTWIMLARVQALMNGEEKLSKRNFEQFRLEIERLEKLSKNGKKKSYLELIL

>C.muris- XP\_002139736.1

MIEGIKKHINETLESALTQGFSTNCGIQGELDNEYSLVRLRGMVEFCLEPELVVYAARY  
KNNTGNNKEVFSGIFKSNMKELGDNLEIKFDTRQVYKLVPIPYLTSWAKSGETSSHDIC  
NCDEEFPLNLRVYKFSQDLSQSRNNEFHFIKSIMNFISLGDGKGGELQDEFKVNELLE  
VIGLVEVFTVEFPDSSDASTCADLSCRGNELQINIESSVPYAVEVVGNGQFKELLSNQEDE  
LSQVICPNESFELRKIYMIHVLGYKRISNYVPIRSLTLGFDGYLAERILAANNRDFLNKL  
ILRGPCKNLDSLYNTLLNYIANRAFSGNLLVAEYVLLSICARKLSNINVKDEFNINDSTQ  
NLGYIALHISNISNHSNRLVVSNIYKVFNDLMPRLINIDVTISNLNSDNFTPWYDSNSCN  
FHTGLLQFPNERNLVIIDETNLEEGKLTGKGMENLLNIKLLSINSIINYKFPAYQVPIRC  
EANVILLSCGAKSLIGDFILKVPLDDVLQDEFIEYTNEDIISRDLLYQLRLYIALVISCT  
DTVYCDSEVLNHVSHTFAERRQAFSKDGREQIRPDILHSWMALSRSYTLKGETNLTKQN  
FDYIMKLETKRMK

>T.gondii - TGME49\_233340

MTANSQARRHNVEASNSPVTSEKHSFESCQGEESVALQLVDKGRQHVTALQGGGAQGRG  
AFPAEDWGEAETLRDAFLATGQHVTDLTILGGISEKELFGLNGKVCRYRGLVQQPLNTEF  
YAGAVPCPRSSKSPDQVVWHTSKYRDKLQCCSALDTVGEDGFLGSDSVDSSEVYLSAT  
ADFPSSSCNSDENKNGQRVLPVQIWNRPYQCVVPGETKWCRLACQRTQSVTGDAGS  
STATETEADGSPIPAALNECTLLYSVDREAAASGECSDGDNAEGDDGVQKTSQKPKQLL  
LNDIVDAVGILSVLPTCEESAVADTLAGVSFGSSLYKCVKHEMEQETQSRCLCTSTEGTP



TQRVASRGVKVRLHVFNWKRVCFFNPAVDRALFHFSLSVVLESPEAPTVTPRKRDSLIR  
FLSKGLGGDLLAAEYLLALCCRRMSSTSSAEDEGGPFSRLKLN FVTRPLSQQNATQQLQ  
LVKQETTAEKGGHGDACKECHCSFSVQSQMMMEVLDNLVPRLVGLSVRPSSLATSSLTPK  
LLDDDSADNLGRLARGVLQ LARGTVLVIDEPEVVSKRVINDACRRIVEADSKCEEREAP  
ISCVKRECADPSVQPNKAGSTEARKDNGQKERKELQAKKLEELNQKAAQNLRALEALVA  
DGEVSYDFIVSRQRVATDTINICMTTSTASSSVFAPHLLPVPVEGTTSSNGVGFQHTKEDC  
ERDRPDSTITDVRDDATEETAVHTDVAVELRQEREIRHWRTLIGAASRRELGVDPDETR  
QMMIEDWVRVRQEDRSVKSDDFPVWLVLADAMAASFGEFCFPLRHDHLSGSAIAERGKDV  
GKLSPEHWHRVMDLETRRRARLAVQKKAEYNSGVECM

>N.caninum - NCLIV\_033130

MTAMAQTREDTLEPAAAPSGTDTRVTVSCHSDEESVALRLVDERFHQHLAALQRGEVQGR  
RVFPSEEWGDIQALRDAFLENGEQLVDLNLGVDVSEQQLLGLTGKVCYRGLVQQPLNTE  
FYAGAVPCPHSCKKSPGQVWHTSKYRDLRCCSALGTSGEDGFRGNDLPSSEFYLSA  
AANFPSSALDSDEHQTGLGGVLPVQIWNRPYHCVSVPGETAWCRRRLARRSTRPEAREAE  
SFTRPGDEERVGRSPVPAALDNCTLLLYTAAGDDAGSGERCAEGIAREDGSA PNTSGEPG  
LLLNDLIDAVGILSVLPASEGDSAQVHTVACASSPCLEISVKPEPQQGIHSRCLCTTIEG  
ASTQSVASKGMTFRLHVFWDWKRVCFFNPVMDRCLFHSSLSRSVVEKAVKVQNLKNEDDAG  
CQLDSSDAPALQSPEESKDTSVRREALVGFLSQPSSQQGKDQQLPLVNQKTTSGNGEHC  
PTENVRGNGGARSGCNCFSHQSR TLMTILES LVPRLVGVSVRPRALATSSMTPKLLDD  
ASEDTLGR LARGALQLARGTILLID EPEVVSKRTLDDACRRIVEADARSEQCKAPSSCVK  
RESGALHDECEYGSSSQPGTGPLSTEAKNENEKERKKQAKKLEELNQKAAENLRALET  
LVADGHVSYDFIFSKQRVATDTINICMTSSLASV FAPHLLPVPVEITNSNSMGPQNTH  
RASDCCGGGSEAGAFNDATEITSAGADGTEGLSHGEMSYWRALVGAASRREQVDIAEE  
TRQMMIEDWVRIRQEDRSVKSDDFTVWLVLADSMSASFGEFC SPLHSSRSDDAVEKCR  
GPGQLSPEHWKRVM DLERQRRARLAAPKISG
